# Supplementary material
Source: ML conference proceedings conference paper supplement (https://openreview.net/forum?id=IbLmsNVlcI)
Supplement: supplementary_material [file attachment]

---

# Supplementary Material

## IFCap: Image-like Retrieval and Frequency-based Entity Filtering for Zero-shot Captioning

---

### A Image-like Retrieval

We observe that Image-like Retrieval is also applicable to other models that employ text-to-text retrieval [2]. We perform **ILR** with  $\epsilon_r = 0.02$  in the training time of Knight. In the COCO test set, every metric except METEOR is improved compared to vanilla Knight, verifying the effectiveness of our **ILR**.

### B Design choice

We find the best threshold setting in heuristic way and adaptive way. In the former case Table 3, we set  $\tau$  ranging from 1 to 8, which is the minimum and maximum value of the given setting. Above 8, performance freeze due to none of the entities being retrieved. In COCO test, we use  $l = 9$  and  $l = 7$  in Flickr30K test split. We can notice that each domain has different optimal  $\tau$ , COCO at 5 and Flickr30K at 3 for the CIDEr score. In contrast to the heuristic way, we can assume such distribution exists from frequencies  $F$ . We try Gaussian distribution and Log-normal distribution with  $\mu$ ,  $\mu + \sigma$ , and  $\mu + 2\sigma$ , capturing upper 50%, 15.8%, and 2.2% based on the frequency of entity. In Table 4, we observe  $\tau_{\text{adap}} = \mu + \sigma$  almost reproduce the performance of global optimal in the heuristic threshold. If ground truth does not exist or computing resource is limited, the adaptive threshold becomes attractive.

### C Comparison with Baselines

We compare baselines [1, 2] with IFCap and IFCap\* in every domain, including in-domain captioning, cross-domain captioning, and video captioning. Result can be found in Table 5

| Method       | COCO        |             |              |             |
|--------------|-------------|-------------|--------------|-------------|
|              | B@4         | M           | C            | S           |
| Knight       | 27.8        | <b>26.4</b> | 98.9         | 19.6        |
| Knight + ILR | <b>29.8</b> | 25.6        | <b>102.7</b> | <b>19.7</b> |

Table 1: Effect of **Image-like Retrieval** on Knight.

| HyperParameters | COCO | Flickr30k | NoCaps | MSVD | MSR-VTT |
|-----------------|------|-----------|--------|------|---------|
| Epochs          | 5    | 30        | -      | 10   | 10      |
| $l$             | 9    | 7         | 7      | 7    | 7       |
| $\tau$          | 5    | 3         | 3      | 5    | 6       |

Table 2: Hyperparameter table.

### D Hyperparameter

We include details about our experiments in each dataset in Table 2.

| $\tau$ | COCO        |             |              |             | Flickr30k   |             |             |             |
|--------|-------------|-------------|--------------|-------------|-------------|-------------|-------------|-------------|
|        | B@4         | M           | C            | S           | B@4         | M           | C           | S           |
| 1      | 6.5         | 18.7        | 6.4          | 17.0        | 6.8         | 18.9        | 3.9         | 15.4        |
| 2      | 21.4        | 26.5        | 80.3         | 21.0        | 18.9        | <b>23.4</b> | 52.2        | <b>17.9</b> |
| 3      | 28.1        | 26.8        | 103.6        | <b>21.1</b> | 23.5        | 23.0        | <b>64.4</b> | 17.0        |
| 4      | 30.2        | <b>26.7</b> | 107.7        | 20.7        | <b>23.8</b> | 22.3        | 61.1        | 15.9        |
| 5      | <b>30.8</b> | <b>26.7</b> | <b>108.0</b> | 20.3        | <b>23.8</b> | 21.9        | 59.1        | 15.3        |
| 6      | 30.4        | 26.4        | 106.2        | 19.9        | 23.6        | 21.7        | 57.3        | 15.0        |
| 7      | 30.0        | 26.1        | 104.6        | 19.6        | 23.6        | 21.6        | 56.5        | 14.8        |
| 8      | 29.8        | 26.0        | 103.4        | 19.4        | 23.7        | 21.6        | 55.9        | 14.7        |

  

| $\tau_{\text{adap}}$                         | COCO        |             |              |             | Flickr30k   |             |             |             |
|----------------------------------------------|-------------|-------------|--------------|-------------|-------------|-------------|-------------|-------------|
|                                              | B@4         | M           | C            | S           | B@4         | M           | C           | S           |
| <i>Lognormal(<math>\mu, \sigma^2</math>)</i> |             |             |              |             |             |             |             |             |
| $\mu$                                        | 22.0        | 26.6        | 83.8         | <b>21.1</b> | 19.0        | <b>23.4</b> | 52.7        | <b>17.9</b> |
| $\mu + \sigma$                               | 29.1        | <b>26.7</b> | <b>106.6</b> | 20.7        | 22.0        | 22.9        | <b>63.0</b> | 17.2        |
| $\mu + 2\sigma$                              | <b>29.6</b> | 26.1        | 103.5        | 19.6        | <b>23.3</b> | 21.8        | 58.1        | 15.3        |
| <i>N(<math>\mu, \sigma^2</math>)</i>         |             |             |              |             |             |             |             |             |
| $\mu$                                        | 24.9        | <b>26.7</b> | 95.9         | <b>21.1</b> | 19.2        | <b>23.2</b> | 55.6        | <b>17.7</b> |
| $\mu + \sigma$                               | <b>30.1</b> | 26.6        | <b>107.5</b> | 20.4        | 22.3        | 22.5        | <b>62.3</b> | 16.4        |
| $\mu + 2\sigma$                              | 29.8        | 26.2        | 104.7        | 19.7        | <b>23.4</b> | 21.9        | 58.5        | 15.5        |
| Best (H)                                     | 30.8        | 26.7        | 108.0        | 20.3        | 23.5        | 23.0        | 64.4        | 17.0        |

Table 3: Ablation studies of heuristic threshold  $\tau$  of **Entity Filtering**.

Table 4: Ablation studies of adaptive threshold  $\tau_{\text{adap}}$  of **Entity Filtering**.

| Method | In-domain    |             |             |             |             |             | Cross-domain                  |             |             |            |             |             |                           |             |                           |             | Video Captioning |            |             |            |
|--------|--------------|-------------|-------------|-------------|-------------|-------------|-------------------------------|-------------|-------------|------------|-------------|-------------|---------------------------|-------------|---------------------------|-------------|------------------|------------|-------------|------------|
|        | COCO         |             | Flickr      |             | In          |             | COCO $\Rightarrow$ NoCaps Val |             |             |            | Entire      |             | COCO $\Rightarrow$ Flickr |             | Flickr $\Rightarrow$ COCO |             | MSR-VTT          |            | MSVD        |            |
|        | C            | S           | C           | S           | C           | S           | Near                          |             | Out         |            | C           | S           | C                         | S           | C                         | S           | C                | S          | C           | S          |
| ViECap | 92.9         | 18.2        | 47.9        | 13.6        | 61.1        | 10.4        | 64.3                          | 9.9         | 65.0        | 8.6        | 66.2        | 9.5         | 38.4                      | 11.2        | 54.2                      | 12.5        | -                | -          | -           | -          |
| Knight | 98.9         | 19.6        | 56.3        | 16.3        | -           | -           | -                             | -           | -           | -          | -           | -           | 48.9                      | 14.2        | 64.4                      | 15.1        | 31.9             | <b>8.5</b> | 63.8        | 5.0        |
| IFCap* | 102.0        | 20.0        | 59.8        | 15.8        | 70.1        | 11.2        | <b>72.5</b>                   | 10.9        | <b>72.1</b> | <b>9.6</b> | <b>74.0</b> | 10.5        | 47.5                      | 12.7        | 60.7                      | 13.6        | 20.8             | 4.1        | 40.2        | 3.4        |
| IFCap  | <b>108.0</b> | <b>20.3</b> | <b>64.4</b> | <b>17.0</b> | <b>75.8</b> | <b>12.4</b> | 72.3                          | <b>11.6</b> | 60.2        | 8.9        | 70.5        | <b>10.8</b> | <b>59.2</b>               | <b>15.6</b> | <b>76.3</b>               | <b>17.3</b> | <b>38.9</b>      | 6.7        | <b>83.9</b> | <b>6.3</b> |

Table 5: Overall comparison among baselines and IFCap.  $\star$ : without **Entity Filtering** module in the inference time.

## E Qualitative Results

We show additional qualitative results in Fig. 1.

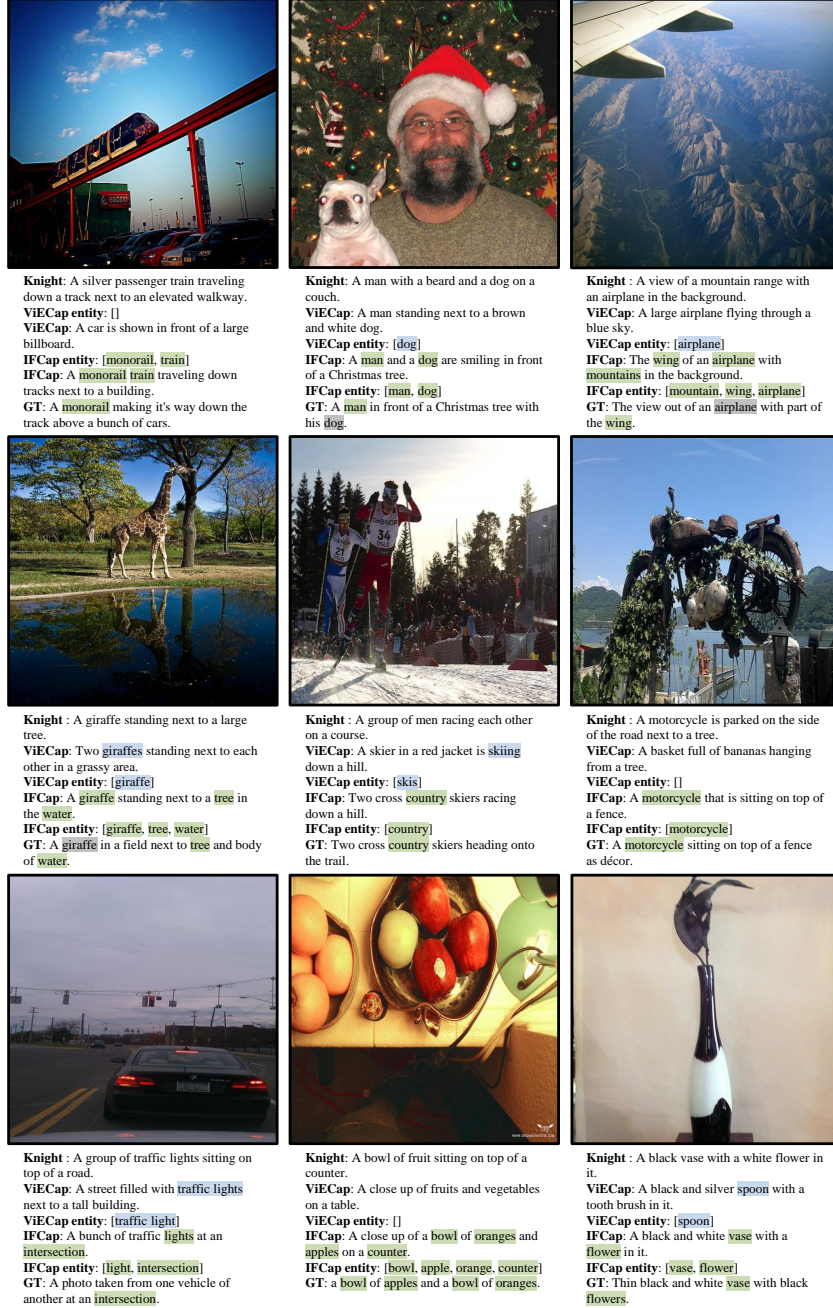

Figure 1: Qualitative result on COCO test set. We highlight the retrieved entities and their appearance in the generated captions with IFCap , ViECap and Intersection .

## References

- [1] Junjie Fei, Teng Wang, Jinrui Zhang, Zhenyu He, Chengjie Wang, and Feng Zheng. Transferable decoding with visual entities for zero-shot image captioning. In *Proceedings of the IEEE/CVF International Conference on Computer Vision*, pages 3136–3146, 2023.
- [2] Junyang Wang, Ming Yan, Yi Zhang, and Jitao Sang. From association to generation: Text-only captioning by unsupervised cross-modal mapping. *arXiv preprint arXiv:2304.13273*, 2023.
